# Supplementary material for: Development of an ammonia sensor based on silver nanoparticles in a poly-methacrylic acid matrix
Source: Royal Society of Chemistry journal article supplement (doi:10.1039/c4tc00515e), 2014-01-01
Supplement: c4tc00515e1.pdf [file c4tc00515e1.pdf]

## SUPPORTING INFORMATION

### **Development of an ammonia sensor based on silver nanoparticles in a poly-methacrylic acid matrix**

C. Cannilla<sup>a</sup>, G. Bonura<sup>a</sup>, F. Frusteri<sup>a</sup>, D. Spadaro<sup>b</sup>, S. Trocino<sup>c</sup>, and G. Neri<sup>b</sup>

<sup>a</sup> CNR-ITAE, Institute of Advanced Technologies for Energy “Nicola Giordano”, Via S. Lucia sopra Contesse 5, 98126, Messina, Italy.  
E-mail: catia.cannilla@itae.cnr.it; giuseppe.bonura@itae.cnr.it; francesco.frusteri@itae.cnr.it; Tel: +39 090 624297.

<sup>b</sup> Department of Electronic Engineering, Chemistry and Industrial Engineering, University of Messina, Contrada di Dio (S. Agata), 98166, Messina, Italy. E-mail: gneri@unime.it; dspadaro@unime.it Tel: +39 090 3977297.

<sup>c</sup> Department of Civil Engineering, Energy, Environment and Materials, University “Mediterranea” of Reggio Calabria, Via Graziella, Feo di Vito, 89124, Reggio Calabria, Italy. E-mail: stefano.trocino@unirc.it; Tel: +39 0965 875462.

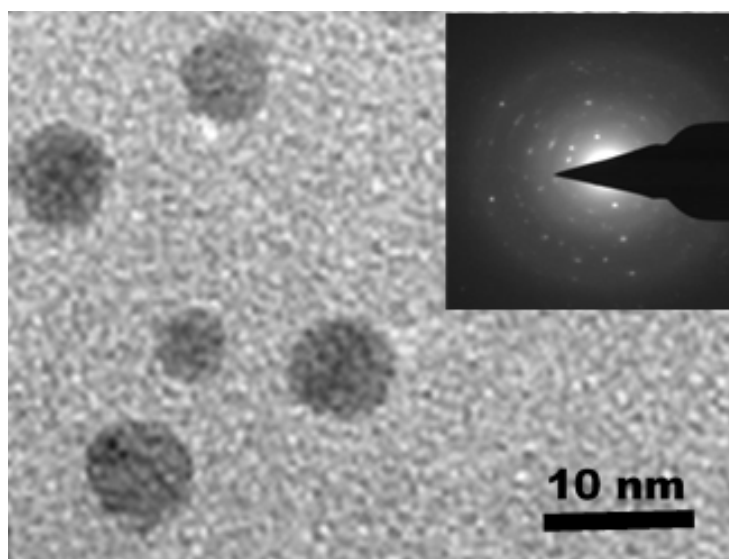

**Fig. S1.** TEM image of Ag1PMA film showing isolated Ag nanoparticles in the PMA matrix. Inside is shown the SAED pattern of one of these particles.

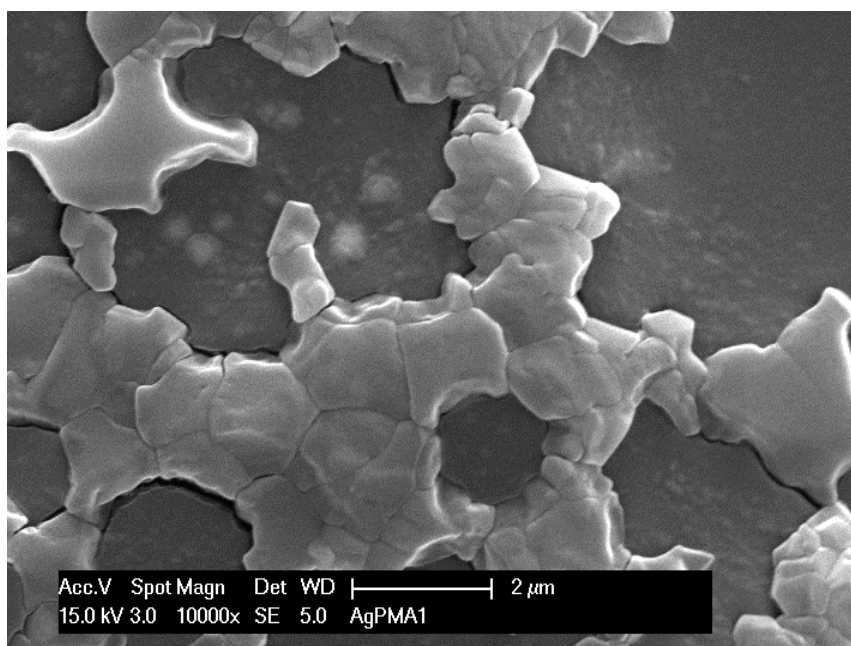

**Fig. S2.** SEM image of Ag1PMA film at higher magnification showing details of dendritic Ag structures.

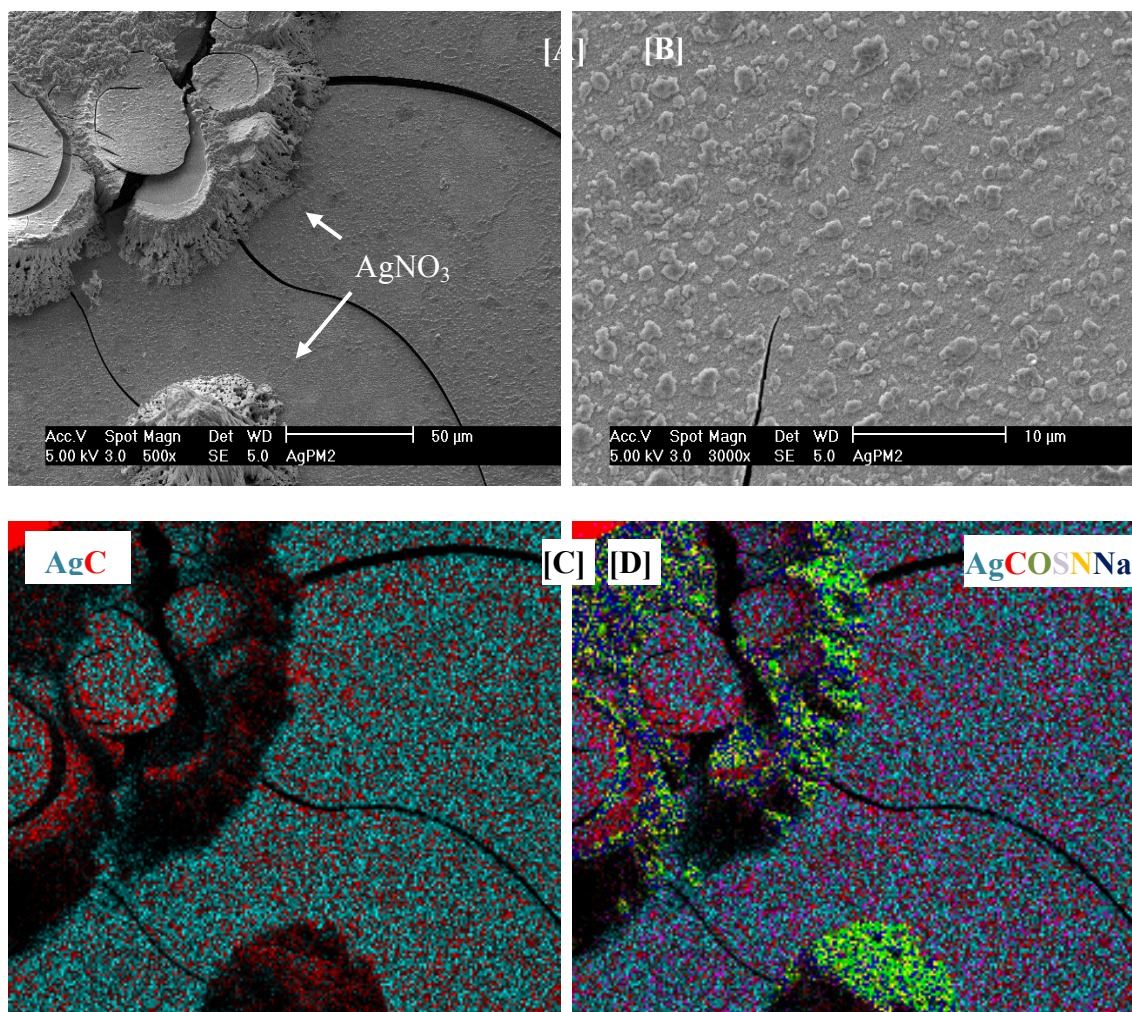

**Fig. S3.** SEM images of Ag<sub>2</sub>PMA film along with EDX measurements [A-B] and mapping analysis [C-D].

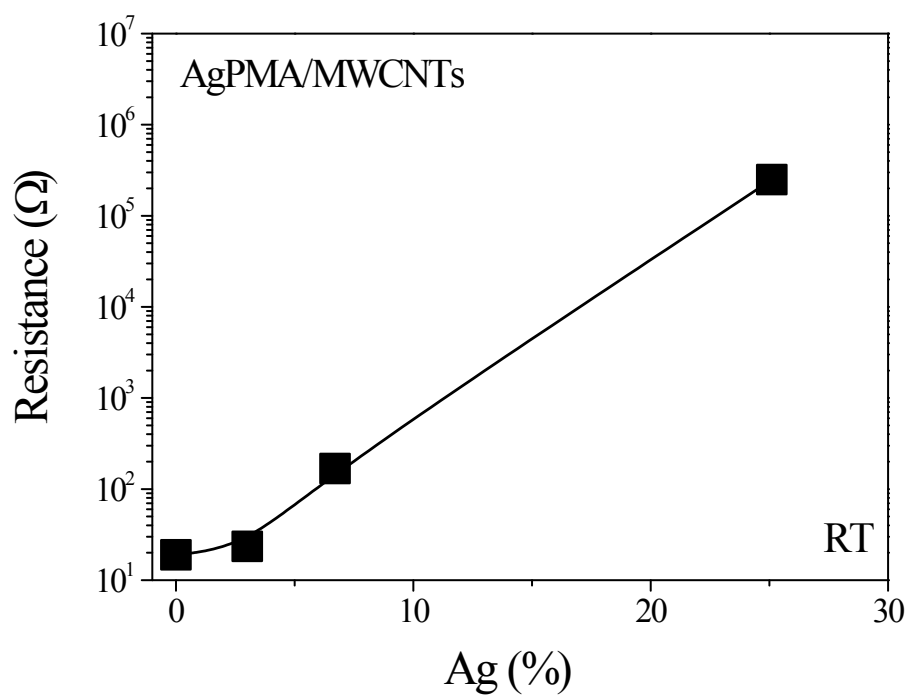

**Fig. S4.** Comparison of baseline resistance (in air) of fabricated sensors as a function of Ag loading at RT.

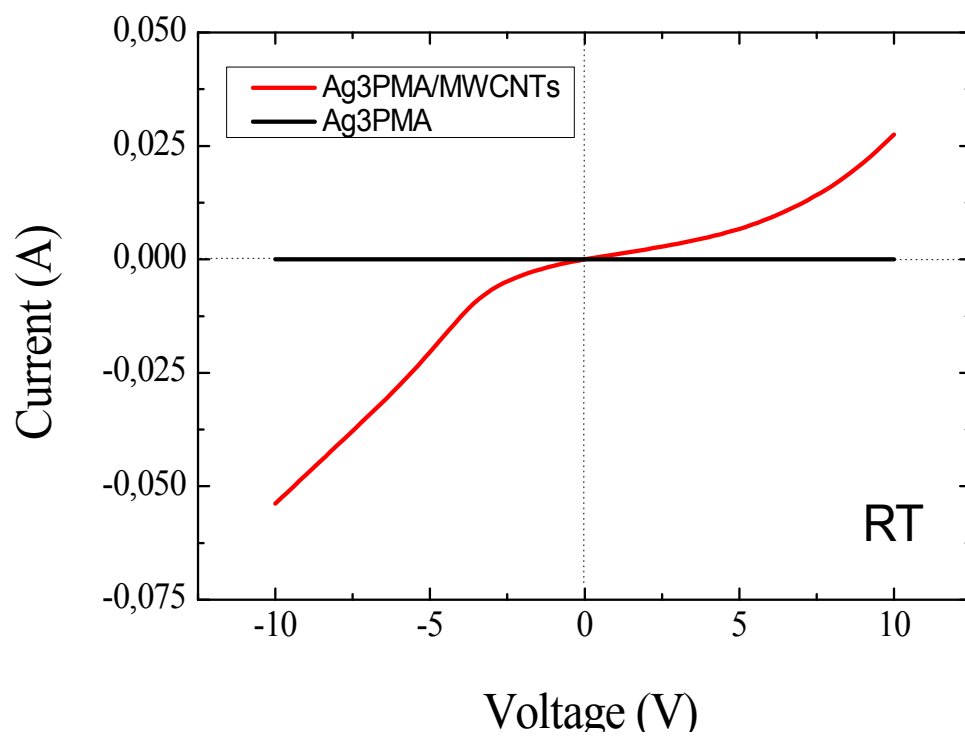

**Fig. S5.** I-V characteristics of Ag3PMA/MWCNTs films

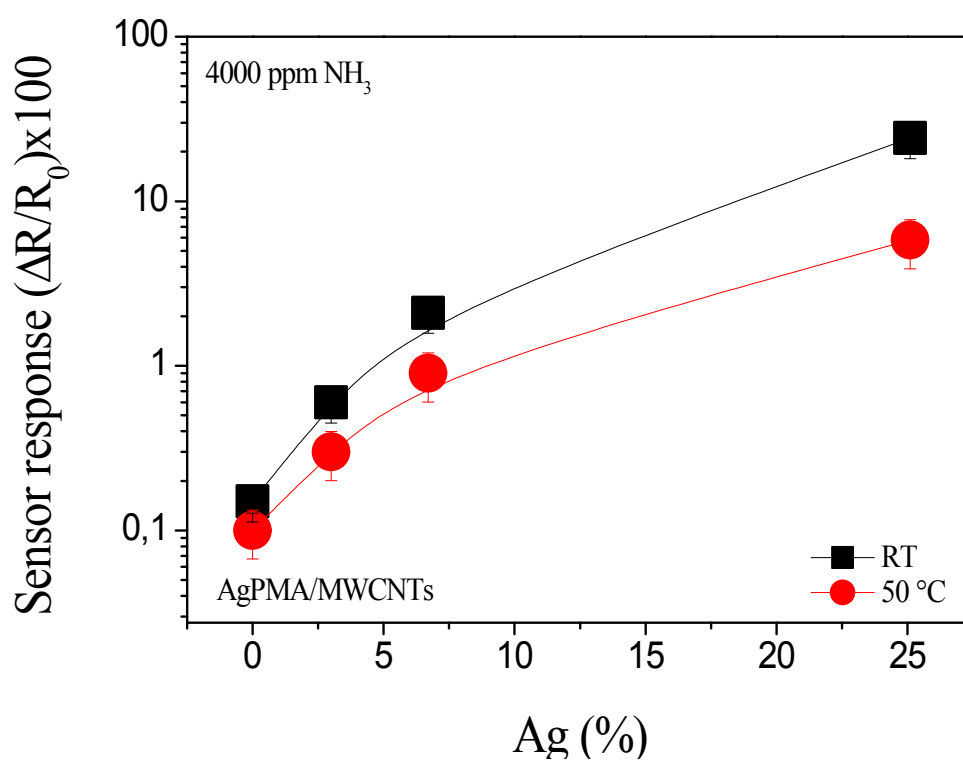

**Fig. S6.** Comparison of sensor response towards 4000 ppm of NH<sub>3</sub> as a function of Ag loading at RT and 50 °C.
